# Supplementary material
Source: publisher site journal article supplement (https://www.dovepress.com/get_supplementary_file.php?f=495568.docx)
Supplement: Supplementary file 1 [file get_supplementary_file.php]

**Supplementary Figure 1.** Histological staining of fungal yeasts and cellular infiltration in spinal cord lesions Immunofluorescence staining with calcofluor white at 400× magnification (A), periodic acid-Schiff staining at 40× magnification (B), and hematoxylin-eosin staining at 200× magnification (C), together demonstrated the presence of fungal yeasts, lymphocyte and plasma cell infiltration, and focal areas of histiocytic proliferation and necrosis in the spinal cord lesion tissue.
